# Supplementary material for: Co-culture for improving the biosynthesis ability of Huperzine A
Source: Research Square preprint supplement (doi:10.21203/rs.3.rs-6221643/v1), 2025-04-03
Supplement: Supplementary file 1 [file fb66ea4c72ea2f557a3d8f63.docx]

**Supplementary Materials**

**A.** Applied Microbiology and Biotechnology

**B.** “Co-culture for improving the biosynthesis ability of Huperzine A”

**C.** Han Wen-Xia, College of Chemical Engineering, Northwest University, Xi'an 710069, PR China *College of medical technology, Xi'an Medical University, Xi'an 710021, PR China,* han[wenxia@](mailto:wenxiahanwendy@163.com)xiyi.edu.cn; Han Zhong-Wen, *Shaanxi Renda Kangjian Pharmaceutical Biotechnology Co., LTD , Xi'an 712000, PR China* [761988159@qq.com](mailto:761988159@qq.com); Mi Yu, College of Chemical Engineering, Northwest University, Xi'an 710069, PR China, [mi_yu@nwu.edu.cn;](mailto:mi_yu@nwu.edu.cn;) Zhang Han,*College of Pharmacy, Xi'an Medical University, Xi'an 710021, PR China,* [2062594580@qq.com](mailto:2062594580@qq.com); Li Wei-Ze,*College of Pharmacy, Xi'an Medical University, Xi'an 710021, PR China,* [weizeli@126.com](mailto:weizeli@126.com); Guan li, *College of Pharmacy, Xi'an Medical University, Xi'an 710021, PR China,* [471589432@qq.com](mailto:471589432@qq.com;Zhang)*[;](mailto:471589432@qq.com;Zhang)* [Zhang](mailto:471589432@qq.com;Zhang) Ning, *College of Pharmacy, Xi'an Medical University, Xi'an 710021, PR China,* [zhangytyning@163.com;](mailto:zhangytyning@163.com;) Wang Lin, *College of medical technology, Xi'an Medical University, Xi'an 710021, PR China,* [64656443@qq.com;](mailto:64656443@qq.com;) Jia Min,*Shaanxi Key Laboratory of Ischemic Cardiovascular Disease, Institute  of Basic and Translational Medicine, Xi'an Medical University, Xi'an, Shaanxi 710021, China,* [13781466@qq.com](mailto:13781466@qq.com); Mei Shan-Shan, *College of Health Administration, Xi'an Medical University, Xi'an 710021, PR China,* [1052632315@qq.com](mailto:26799235@qq.com).

**D.** Correspondence author: Mi Yu, College of Chemical Engineering, Northwest University, Xi'an 710069, PR China, Tel.:15829743785, E-mail address:[mi_yu@nwu.edu.cn](mailto:mi_yu@nwu.edu.cn;).

**Tab.S1** List of abbreviations

**Tab.S1** List of abbreviations

| Abbreviations | Full name |
| --- | --- |
| Hup A | Huperzine A |
| *HS* | *Huperzia serrata* |
| *LS* | *Lycopodium serrata* |
| AD | Alzheimer's disease |
| APIs | Active pharmaceutical ingredients |
| AChE | Acetylcholinesterase |
| AChEIs | Acetylcholinesterase inhibitors |
| SHA | Standard HupA |
| PDA | Glucose potato nutrient Agar |
| PDB | potato glucose broth |

| Abbreviations | Full name |
| --- | --- |
| Hup A | Huperzine A |
| *HS* | *Huperzia serrata* |
| *LS* | *Lycopodium serrata* |
| AD | Alzheimer's disease |
| APIs | Active pharmaceutical ingredients |
| AChE | Acetylcholinesterase |
| AChEIs | Acetylcholinesterase inhibitors |
| SHA | Standard HupA |
| PDA | Glucose potato nutrient Agar |
| PDB | potato glucose broth |

**Fig.S1** PCR amplification and agarose gel electrophoresis


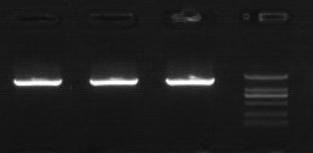


**Seq.S1** The 16S rDNA of *Serratia marcescens* HL1 (NCBI: MW632158)

>Seq *Serratia marcescens* HL1(MW632158)

GGCTCAGATTGAACGCTGGCGGCAGGCTTAACACATGCAAGTCGAGCGGTAGCACAGGGGAGCTTGCTCCCCGGGTGACGAGCGGCGGACGGGTGAGTAATGTCTGGGAAACTGCCTGATGGAGGGGGATAACTACTGGAAACGGTAGCTAATACCGCATAACGTCGCAAGACCAAAGAGGGGGACCTTCGGGCCTCTTGCCATCAGATGTGCCCAGATGGGATTAGCTAGTAGGTGGGGTAATGGCTCACCTAGGCGACGATCCCTAGCTGGTCTGAGAGGATGACCAGCCACACTGGAACTGAGACACGGTCCAGACTCCTACGGGAGGCAGCAGTGGGGAATATTGCACAATGGGCGCAAGCCTGATGCAGCCATGCCGCGTGTGTGAAGAAGGCCTTCGGGTTGTAAAGCACTTTCAGCGAGGAGGAAGGTGGTGAGCTTAATACGCTCATCAATTGACGTTACTCGCAGAAGAAGCACCGGCTAACTCCGTGCCAGCAGCCGCGGTAATACGGAGGGTGCAAGCGTTAATCGGAATTACTGGGCGTAAAGCGCACGCAGGCGGTTTGTTAAGTCAGATGTGAAATCCCCGGGCTCAACCTGGGAACTGCATTTGAAACTGGCAAGCTAGAGTCTCGTAGAGGGGGGTAGAATTCCAGGTGTAGCGGTGAAATGCGTAGAGATCTGGAGGAATACCGGTGGCGAAGGCGGCCCCCTGGACGAAGACTGACGCTCAGGTGCGAAAGCGTGGGGAGCAAACAGGATTAGATACCCTGGTAGTCCACGCTGTAAACGATGTCGATTTGGAGGTTGTGCCCTTGAGGCGTGGCTTCCGGAGCTAACGCGTTAAATCGACCGCCTGGGGAGTACGGCCGCAAGGTTAAAACTCAAATGAATTGACGGGGGCCCGCACAAGCGGTGGAGCATGTGGTTTAATTCGATGCAACGCGAAGAACCTTACCTACTCTTGACATCCAGAGAACTTAGCAGAGATGCTTTGGTGCCTTCGGGAACTCTGAGACAGGTGCTGCATGGCTGTCGTCAGCTCGTGTTGTGAAATGTTGGGTTAAGTCCCGCAACGAGCGCAACCCTTATCCTTTGTTGCCAGCGGTTCGGCCGGGAACTCAAAGGAGACTGCCAGTGATAAACTGGAGGAAGGTGGGGATGACGTCAAGTCATCATGGCCCTTACGAGTAGGGCTACACACGTGCTACAATGGCGTATACAAAGAGAAGCGACCTCGCGAGAGCAAGCGGACCTCATAAAGTACGTCGTAGTCCGGATTGGAGTCTGCAACTCGACTCCATGAAGTCGGAATCGCTAGTAATCGTAGATCAGAATGCTACGGTGAATACGTTCCCGGGCCTTGTACACACCGCCCGTCACACCATGGGAGTGGGTTGCAAAAGAAGTAGTAGCTTAACCTTC
